# Supplementary material for: Cell type‐specific transcriptomics of esophageal adenocarcinoma as a scalable alternative for single cell transcriptomics
Source: PubMed Central journal article supplement (PMC7266280; doi:10.1002/1878-0261.12680), 2020-04-21
Supplement: MOL2-14-1170-s001.pdf [file MOL2-14-1170-s001.pdf]

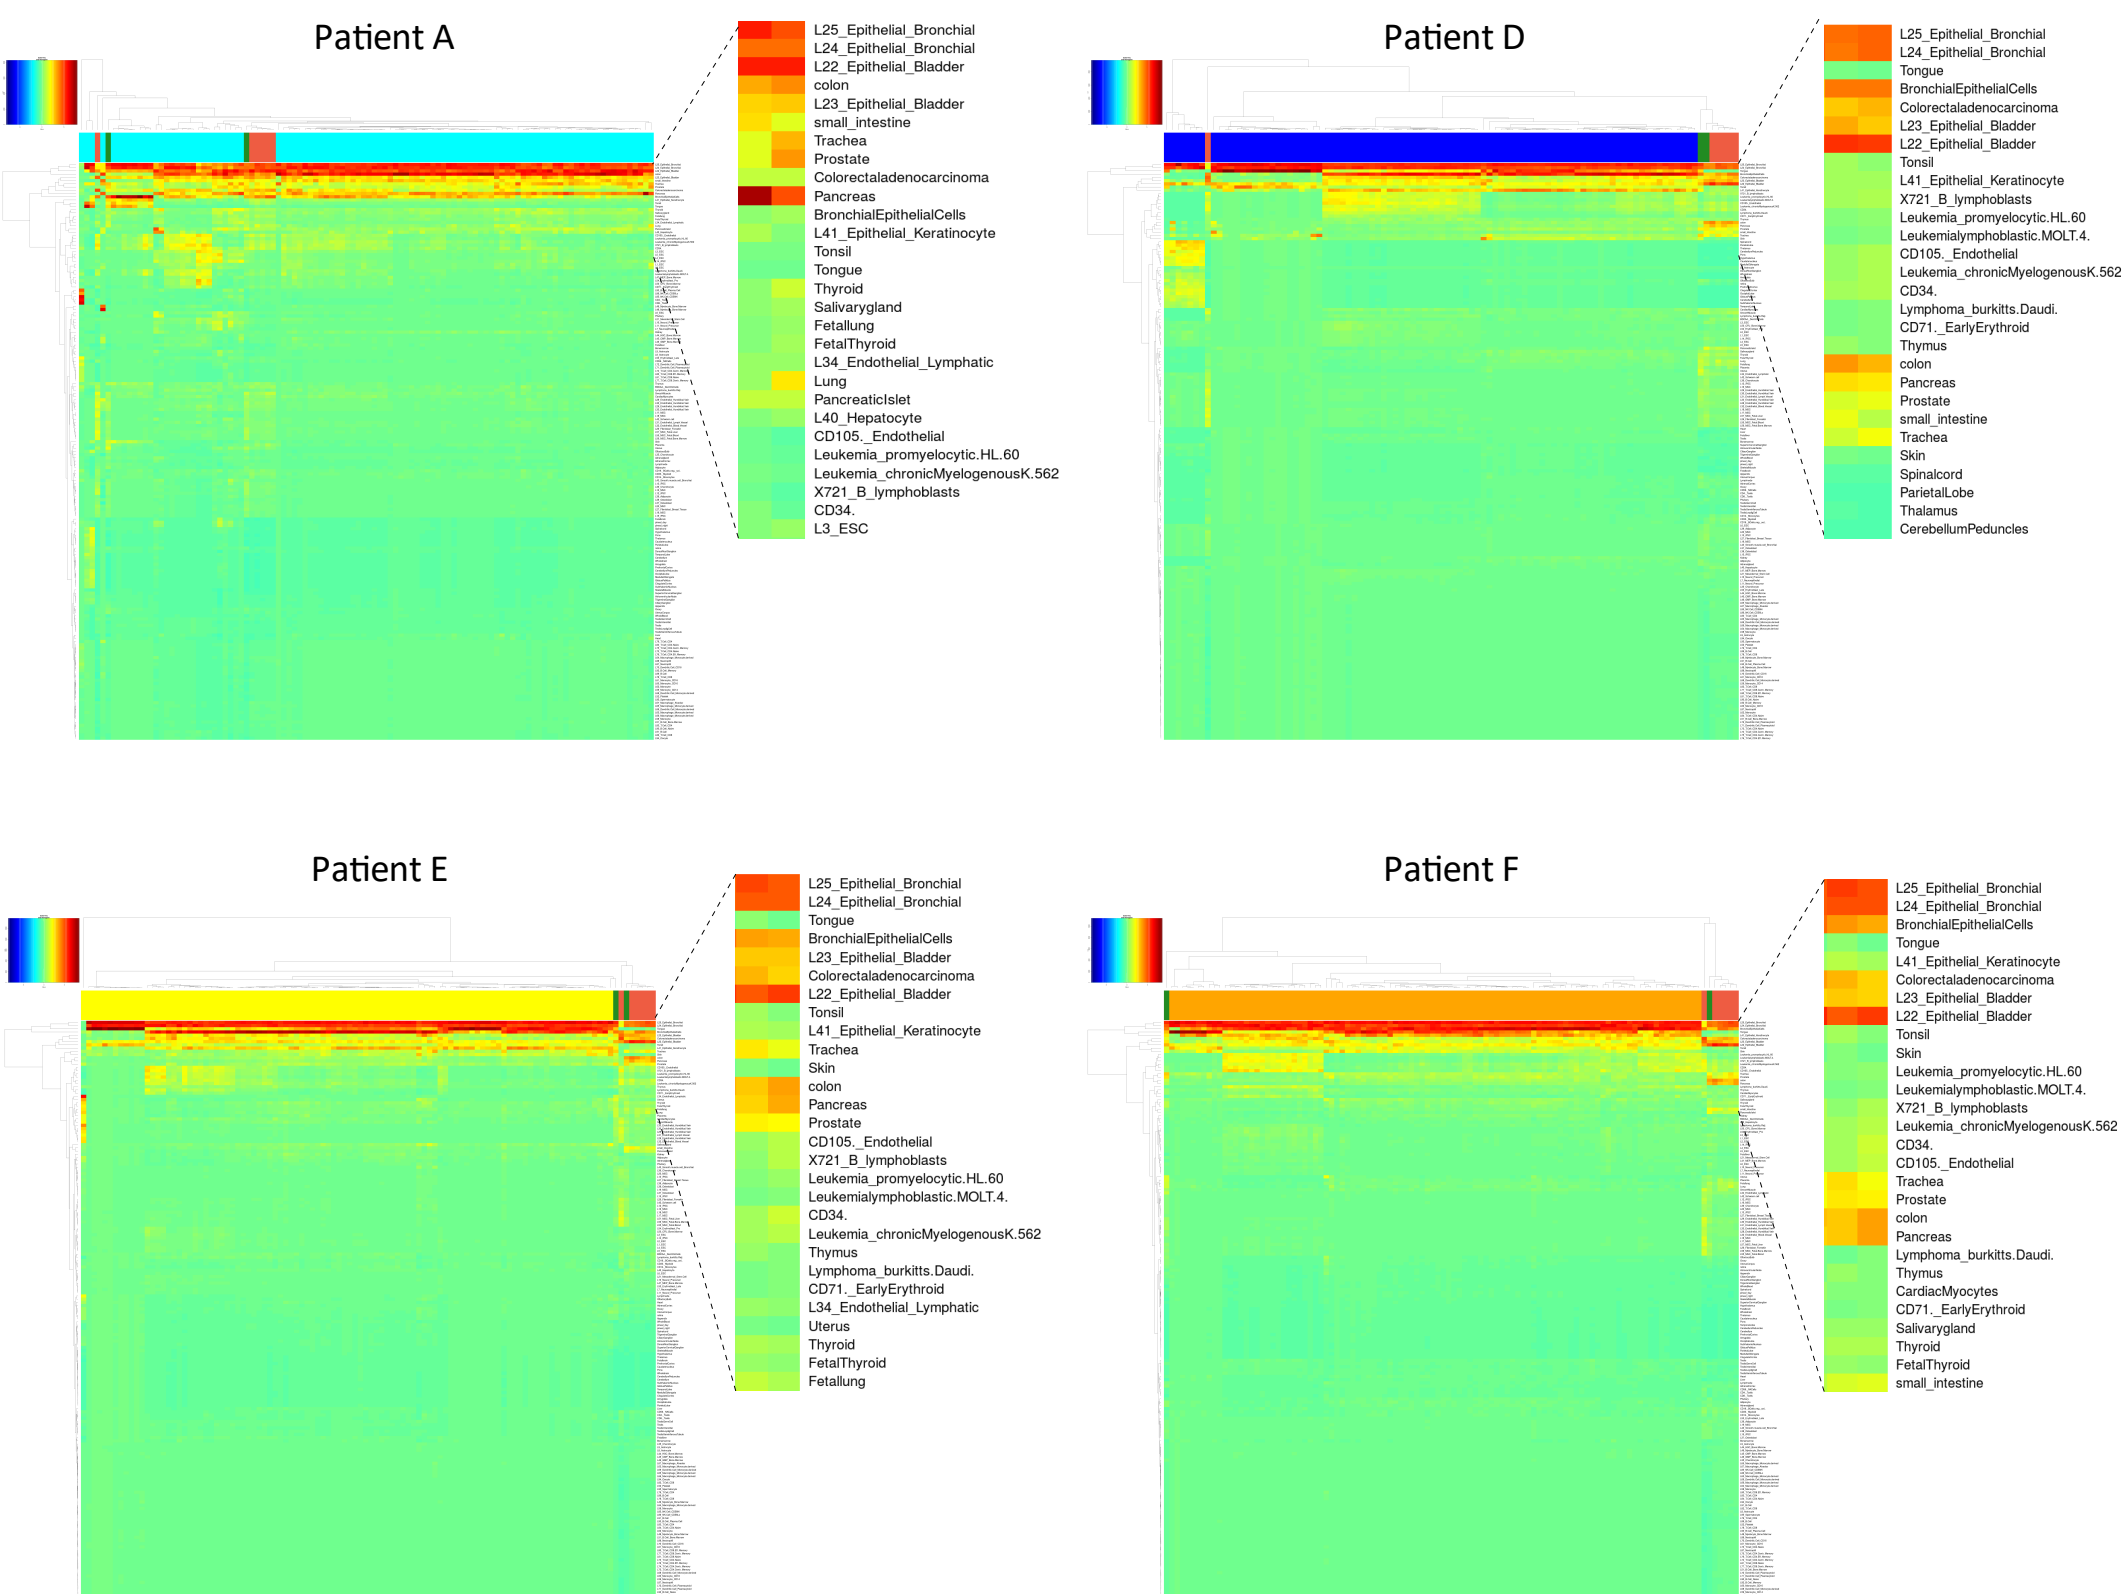

- bulk RNA-seq epithelial cells tumor
- bulk RNA-seq epithelial cells normal
- scRNA-seq Barrett's epithelial, Patient A
- scRNA-seq Barrett's epithelial, Patient D
- scRNA-seq normal epithelial, Patient E
- scRNA-seq normal epithelial, Patient F

**Supplementary Figure 1. Comparison of scRNA-seq and cell type-specific RNA-seq of non-cancer epithelial esophagus cells.**

Random samples of 100 single-cells each from four different patients with Barrett's esophagus (A and D) or without Barrett's esophagus (E and F) were selected from (Owen et al., 2018) and a matrix of counts was generated by adding the raw counts from the bulk RNA-seq of epithelial cells from flow-sorted samples. RCA clustering shows high projection scores onto epithelial tissues for both, single-cells as well for FACS-sorted samples.
